# Supplementary material for: Long Noncoding RNAs and Messenger RNAs Expression Profiles Potentially Regulated by ZBTB7A in Nasopharyngeal Carcinoma
Source: Hindawi journal article supplement (doi:10.1155/2019/7246491), 2019-06-11
Supplement: f5 [file 7246491.f5.pdf]

Supplementary 5. Table S1

TABLE S1: The list of specific primers of 15 differentially expressed mRNAs  
designed utilizing primer 5.0

| Gene Symbol       | Sequence name   | Prime Sequence                                               |
|-------------------|-----------------|--------------------------------------------------------------|
| GAPDH*<br>(Human) | NM_002046.5     | F:5'GGGAAACTGTGGCGTGAT3'<br>R:5'GAGTGGGTGTCGCTGTTGA3'        |
| MMP10             | NM_002425.2     | F:5'CGTTGGTCACTTCAGCTCCT3'<br>R:5'TCAATGGCAGAATCAACAGC3'     |
| LOXL2             | NM_002318.2     | F:5'CATCCACCTCAACGAGATCC3'<br>R:5'TCTCACACCAGCATCCTCCT3'     |
| SOCS3             | NM_003955.4     | F:5'CTGGTGGTGAACGCAGTG3'<br>R:5'AGCTGTCGCGGATCAGAA3'         |
| FBLN1             | NM_001996.3     | F:5'CATCAACGAGACCTGCTTCA3'<br>R:5'GATTCTCATGGCAAGGCAAG3'     |
| MYLK              | NM_053027.3     | F:5'CAGTGCCAGGTGTCTTCTGA3'<br>R:5'GAGCAGAGTGAGCCTTCCTG3'     |
| CLIC5             | NM_016929.4     | F:5'CCATGTGGTCAAGATTGTGG3'<br>R:5'TGCACAGGTGTTGGTGAACT3'     |
| IL24              | NM_001185156.1  | F:5'CTCGGATGCTGAGAGCTGTT3'<br>R:5'GGCCAGAGTAGAGAATGACTTCAG3' |
| ALOX15B           | NM_001039131.1  | F:5'CCGAGGAGTTGAAGACATCC3'<br>R:5'GGCGGAGCAGGTGAATATC3'      |
| CRABP2            | NM_001878.3     | F:5'CAACTTCTCTGGCAACTGGA3'<br>R:5'GATCTCCACTGCTGGCTTG3'      |
| EMP3              | ENST00000270221 | F:5'GCCATGTCACTCCTCTTGCT3'<br>R:5'ACGTGCAGTCGTACCAGAGA3'     |
| TGM2              | NM_004613.3     | F:5'ACCGCTGAGGAGTACGTCTG3'<br>R:5'CAGGTTGAGGTTGAGCAGGT3'     |
| YAP1              | NM_001195044.1  | F:5'AGACAACAACATGGCAGGAC3'                                   |

|          |                               |                                                                                               |
|----------|-------------------------------|-----------------------------------------------------------------------------------------------|
| BCCIP    | NM_016567.3                   | R:5'CCATCCATCAGGAAGAGGAC3'<br>F:5'CCAGTTCCGATACAGCACAA3'                                      |
| CDKN2AIP | NM_017632.3                   | R:5'GACAGAGCAATTCCAACAGTCA3'<br>F:5'AGCTCTGGCATCTCCAGTCA3'                                    |
| SREBF1   | NM_004176 and<br>NM_001005291 | R:5'CAGATCCTGCCGTTGTTACC3'<br>F:5' GCTGTTGGTGCTCGTCTCCTTG3'<br>R:5' GCTTGCGATGCCTCCAGAAGTAC3' |

---

\* GAPDH was used to as an internal reference control.
